# Supplementary material for: Characterization and Determination of Nanoparticles in Commercial Processed Foods
Source: MDPI journal article supplement (doi:10.3390/foods10092020), 2021-08-28
Supplement: s1 [file s1]

## Supplementary Materials

# Characterization and Determination of Nanoparticles in Commercial Processed Foods

Jin Yu, Ye-Rin Jeon, Ye-Hyun Kim, Eun-Been Jung and Soo-Jin Choi \*

Division of Applied Food System, Major of Food Science & Technology, Seoul Women's University, Seoul 01797, Republic of Korea; ky5031@swu.ac.kr (J.Y.); yrjeon0715@swu.ac.kr (Y.-R.J.); ye4978@swu.ac.kr (Y.-H.K.); ebe2@swu.ac.kr (E.-B.J.)

\* Correspondence: sjchoi@swu.ac.kr; Tel.: +82-2-970-5634; Fax: +82-2-970-5977

**Table S1.** Major components of NBWs, conventional SWs, TD-NP, and conventional BP products. <sup>1</sup>

| NBWs             |                                          | TD-NP products           |                      |
|------------------|------------------------------------------|--------------------------|----------------------|
| Sample           | Major Components                         | Sample                   | Major Components     |
| NBW-1            | Water and hydrogen (hydrogen nanobubble) | NP-1                     | Red ginseng          |
| NBW-2            | Water and hydrogen (hydrogen nanobubble) | NP-2                     | Chaga mushroom       |
| NBW-3            | Water and hydrogen (hydrogen nanobubble) | NP-3                     | Soybean and granola  |
| NBW-4            | Water (oxygen nanobubble)                | NP-4                     | Ginkgo biloba        |
| NBW-5            | Water and oxygen (oxygen nanobubble)     | NP-5                     | Grape seed           |
| NBW-6            | Water and oxygen (oxygen nanobubble)     | NP-6                     | Lactic acid bacteria |
| NBW-7            | Water (ozone nanobubble)                 | NP-7                     | Oyster shell calcium |
| Conventional SWs |                                          | Conventional BP products |                      |
| Sample           | Major components                         | Sample                   | Major components     |
| SW-1             | Water and carbon dioxide                 | BP-1                     | Red ginseng          |
| SW-2             | Water and carbon dioxide                 | BP-2                     | Chaga mushroom       |

<sup>1</sup> NBWs, nanobubble waters; SWs, sparkling waters; TD-NP, top-down approach produced nanoparticle; BP, bulk-sized particle.
